# Supplementary material for: Tuning the photophysical properties of ESIPT active unsymmetrical azine dyes by the change in the substituent and solvent: TD-PBE0 and TD-CAM-B3LYP studies
Source: Royal Society of Chemistry journal article supplement (doi:10.1039/d4me00039k), 2024-01-01
Supplement: d4me00039k1.pdf [file d4me00039k1.pdf]

**Table S1.** Relative energies of **L1-L5** (R1-5= -H, -NH<sub>2</sub>, -OCH<sub>3</sub>, -CF<sub>3</sub>, and -CN) at the S<sub>0</sub> and S<sub>1</sub> states calculated at CAM-B3LYP/6-31++G(d,p) level

| CAM-B3LYP |           |                   |                     |                   |                   |                   |
|-----------|-----------|-------------------|---------------------|-------------------|-------------------|-------------------|
| Media     | Molecule  | S <sub>0</sub> -E | S <sub>1</sub> (FC) | S <sub>1</sub> -E | S <sub>0</sub> -K | S <sub>1</sub> -K |
| Gas       | <b>L1</b> | 0.00              | 81.44               | 75.42             | 8.67              | 76.40             |
|           | <b>L2</b> | 0.00              | 80.97               | 74.90             | 7.13              | 77.75             |
|           | <b>L3</b> | 0.00              | 81.25               | 75.13             | 6.57              | 76.91             |
|           | <b>L4</b> | 0.00              | 79.84               | 73.91             | 8.08              | 75.36             |
|           | <b>L5</b> | 0.00              | 78.35               | 72.45             | 8.30              | 74.30             |
| DMSO      | <b>L1</b> | 0.00              | 78.66               | 67.99             | 5.96              | 68.71             |
|           | <b>L2</b> | 0.00              | 77.88               | 66.90             | 4.25              | 69.01             |
|           | <b>L3</b> | 0.00              | 83.22               | 67.84             | 4.00              | 68.54             |
|           | <b>L4</b> | 0.00              | 77.24               | 66.53             | 5.37              | 66.89             |
|           | <b>L5</b> | 0.00              | 75.59               | 64.67             | 5.60              | 65.34             |
| MeOH      | <b>L1</b> | 0.00              | 78.97               | 68.09             | 6.01              | 68.82             |
|           | <b>L2</b> | 0.00              | 78.21               | 67.02             | 4.30              | 69.14             |
|           | <b>L3</b> | 0.00              | 78.84               | 67.94             | 4.04              | 68.66             |
|           | <b>L4</b> | 0.00              | 77.53               | 66.64             | 5.41              | 67.00             |
|           | <b>L5</b> | 0.00              | 75.88               | 64.78             | 5.65              | 65.47             |
| Toluene   | <b>L1</b> | 0.00              | 78.78               | 71.69             | 7.44              | 72.76             |
|           | <b>L2</b> | 0.00              | 78.17               | 70.88             | 5.83              | 73.49             |
|           | <b>L3</b> | 0.00              | 78.66               | 71.44             | 5.38              | 72.76             |
|           | <b>L4</b> | 0.00              | 77.18               | 70.20             | 6.82              | 71.16             |
|           | <b>L5</b> | 0.00              | 75.56               | 68.47             | 7.05              | 69.85             |

**Table S2.** The calculated absorption and emission wavelengths ( $\lambda$ ) and oscillator strength ( $f$ ) of **L1-L5** (R1-5= -H, -NH<sub>2</sub>, -OCH<sub>3</sub>, -CF<sub>3</sub>, and -CN) in the gas phase

|                  | S <sub>0</sub> -E | S <sub>1</sub> -E | S <sub>0</sub> -K | S <sub>1</sub> -K |
|------------------|-------------------|-------------------|-------------------|-------------------|
| <b>L1</b>        | CAM-B3LYP         |                   |                   |                   |
| $\lambda_1$ (nm) | 351               | 411               | 397               | 451               |
| $\lambda_1$ (eV) | 3.53              | 3.01              | 3.12              | 2.74              |
| $\lambda_2$ (nm) | 303               | 350               | 331               | 357               |
| $\lambda_3$ (nm) | 295               | 319               | 329               | 356               |
| $f_1$            | 1.431             | 1.563             | 1.038             | 0.937             |
| $f_2$            | 0.001             | 0.003             | 0.002             | 0.566             |
| $f_3$            | 0.03              | 0.016             | 0.409             | 0.012             |
| <b>L2</b>        |                   |                   |                   |                   |
| $\lambda_1$ (nm) | 353               | 416               | 380               | 432               |
| $\lambda_1$ (eV) | 3.51              | 2.98              | 3.25              | 2.87              |
| $\lambda_2$ (nm) | 298               | 343               | 327               | 356               |
| $\lambda_3$ (nm) | 296               | 313               | 314               | 335               |
| $f_1$            | 1.693             | 1.823             | 1.366             | 1.361             |
| $f_2$            | 0.003             | 0.003             | 0.373             | 0.416             |
| $f_3$            | 0.043             | 0.043             | 0                 | 0                 |
| <b>L3</b>        |                   |                   |                   |                   |
| $\lambda_1$ (nm) | 351               | 414               | 382               | 433               |
| $\lambda_1$ (eV) | 3.52              | 2.99              | 3.24              | 2.86              |
| $\lambda_2$ (nm) | 299               | 345               | 320               | 346               |
| $\lambda_3$ (nm) | 296               | 313               | 314               | 331               |
| $f_1$            | 1.612             | 1.749             | 1.369             | 1.408             |
| $f_2$            | 0.002             | 0.003             | 0.235             | 0.263             |
| $f_3$            | 0.041             | 0.041             | 0                 | 0                 |
| <b>L4</b>        |                   |                   |                   |                   |
| $\lambda_1$ (nm) | 358               | 419               | 401               | 450               |
| $\lambda_1$ (eV) | 3.46              | 2.96              | 3.09              | 2.75              |
| $\lambda_2$ (nm) | 306               | 354               | 333               | 357               |
| $\lambda_3$ (nm) | 295               | 320               | 331               | 354               |
| $f_1$            | 1.464             | 1.574             | 1.128             | 1.171             |
| $f_2$            | 0.001             | 0.003             | 0.004             | 0.366             |
| $f_3$            | 0.033             | 0.044             | 0.336             | 0.002             |
| <b>L5</b>        |                   |                   |                   |                   |
| $\lambda_1$ (nm) | 364               | 428               | 410               | 457               |
| $\lambda_1$ (eV) | 3.4               | 2.89              | 3.02              | 2.71              |
| $\lambda_2$ (nm) | 309               | 358               | 339               | 362               |
| $\lambda_3$ (nm) | 301               | 325               | 338               | 360               |
| $f_1$            | 1.555             | 1.691             | 1.111             | 1.18              |
| $f_2$            | 0.001             | 0.003             | 0.024             | 0.436             |
| $f_3$            | 0.027             | 0.038             | 0.402             | 0.003             |

**Table S3.** The calculated absorption and fluorescence emission properties of **L1-L5** (R1-5= -H, -NH<sub>2</sub>, -OCH<sub>3</sub>, -CF<sub>3</sub>, and -CN) in different solvents.

|           |                     | <b>CAM-B3LYP</b>  |                   |                   |                   |
|-----------|---------------------|-------------------|-------------------|-------------------|-------------------|
|           |                     | S <sub>0</sub> -E | S <sub>1</sub> -E | S <sub>0</sub> -K | S <sub>1</sub> -K |
| <b>L1</b> | <b>DMSO</b>         |                   |                   |                   |                   |
|           | λ <sub>1</sub> (nm) | 363               | 481               | 404               | 500               |
|           | <i>fl</i>           | 1.61              | 2.012             | 1.276             | 1.644             |
|           | <b>MeOH</b>         |                   |                   |                   |                   |
|           | λ <sub>1</sub> (nm) | 362               | 480               | 409               | 499               |
|           | <i>fl</i>           | 1.587             | 2.007             | 1.303             | 1.637             |
|           | <b>Toluene</b>      |                   |                   |                   |                   |
|           | λ <sub>1</sub> (nm) | 362               | 443               | 409               | 470               |
|           | <i>fl</i>           | 1.616             | 1.82              | 1.224             | 1.347             |
| <b>L2</b> | <b>DMSO</b>         |                   |                   |                   |                   |
|           | λ <sub>1</sub> (nm) | 367               | 492               | 388               | 490               |
|           | <i>fl</i>           | 1.921             | 2.244             | 1.721             | 2.024             |
|           | <b>MeOH</b>         |                   |                   |                   |                   |
|           | λ <sub>1</sub> (nm) | 365               | 491               | 387               | 489               |
|           | <i>fl</i>           | 1.893             | 2.24              | 1.694             | 2.017             |
|           | <b>Toluene</b>      |                   |                   |                   |                   |
|           | λ <sub>1</sub> (nm) | 365               | 450               | 392               | 458               |
|           | <i>fl</i>           | 1.912             | 2.065             | 1.64              | 1.774             |
| <b>L3</b> | <b>DMSO</b>         |                   |                   |                   |                   |
|           | λ <sub>1</sub> (nm) | 364               | 484               | 391               | 490               |
|           | <i>fl</i>           | 1.784             | 2.123             | 1.611             | 1.911             |
|           | <b>MeOH</b>         |                   |                   |                   |                   |
|           | λ <sub>1</sub> (nm) | 362               | 482               | 389               | 489               |
|           | <i>fl</i>           | 1.761             | 2.12              | 1.591             | 1.906             |
|           | <b>Toluene</b>      |                   |                   |                   |                   |
|           | λ <sub>1</sub> (nm) | 363               | 446               | 394               | 459               |
|           | <i>fl</i>           | 1.792             | 1.968             | 1.568             | 1.708             |
| <b>L4</b> | <b>DMSO</b>         |                   |                   |                   |                   |
|           | λ <sub>1</sub> (nm) | 370               | 493               | 411               | 512               |
|           | <i>fl</i>           | 1.621             | 2.039             | 1.318             | 1.679             |
|           | <b>MeOH</b>         |                   |                   |                   |                   |
|           | λ <sub>1</sub> (nm) | 368               | 491               | 409               | 511               |
|           | <i>fl</i>           | 1.600             | 2.031             | 1.303             | 1.674             |
|           | <b>Toluene</b>      |                   |                   |                   |                   |
|           | λ <sub>1</sub> (nm) | 370               | 452               | 414               | 477               |
|           | <i>fl</i>           | 1.625             | 1.843             | 1.286             | 1.47              |
| <b>L5</b> | <b>DMSO</b>         |                   |                   |                   |                   |
|           | λ <sub>1</sub> (nm) | 378               | 512               | 423               | 526               |
|           | <i>fl</i>           | 1.716             | 2.181             | 1.281             | 1.687             |
|           | <b>MeOH</b>         |                   |                   |                   |                   |
|           | λ <sub>1</sub> (nm) | 376               | 511               | 421               | 525               |
|           | <i>fl</i>           | 1.694             | 2.176             | 1.265             | 1.682             |
|           | <b>Toluene</b>      |                   |                   |                   |                   |
|           | λ <sub>1</sub> (nm) | 378               | 465               | 425               | 488               |
|           | <i>fl</i>           | 1.724             | 1.975             | 1.265             | 1.479             |

### L1

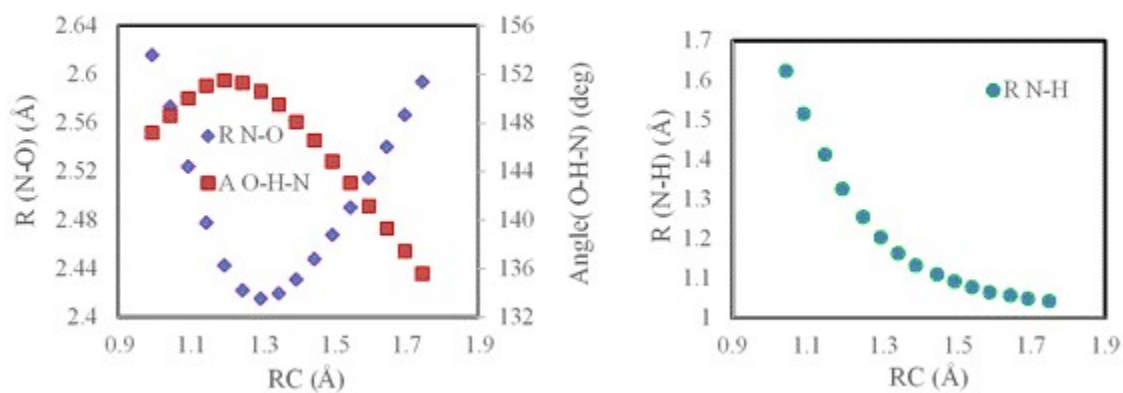

### L2

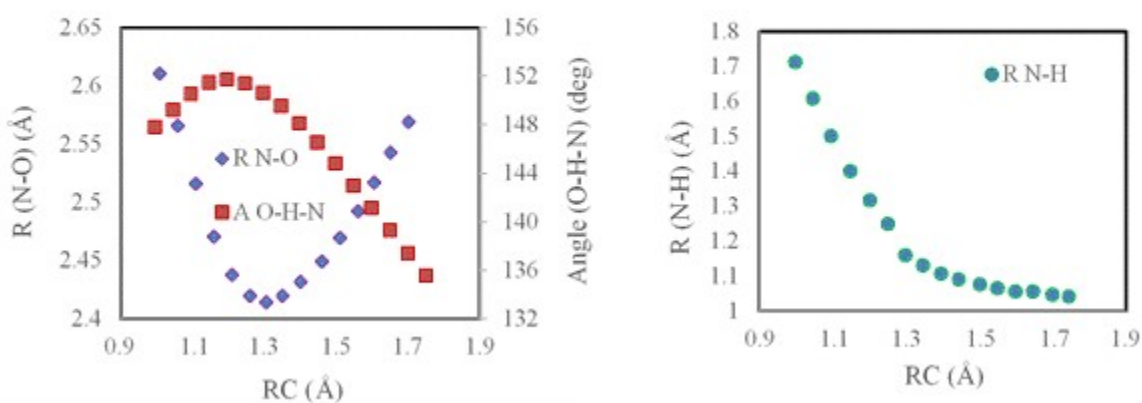

### L3

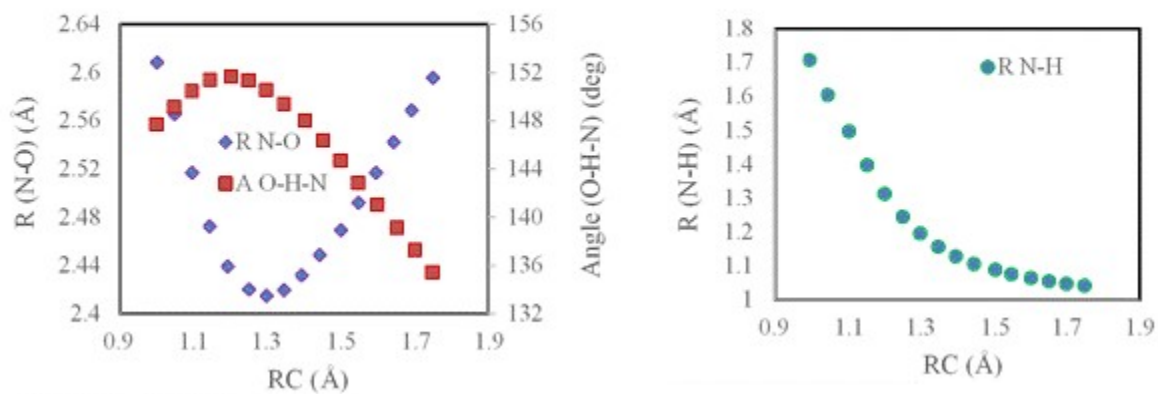

**L4**

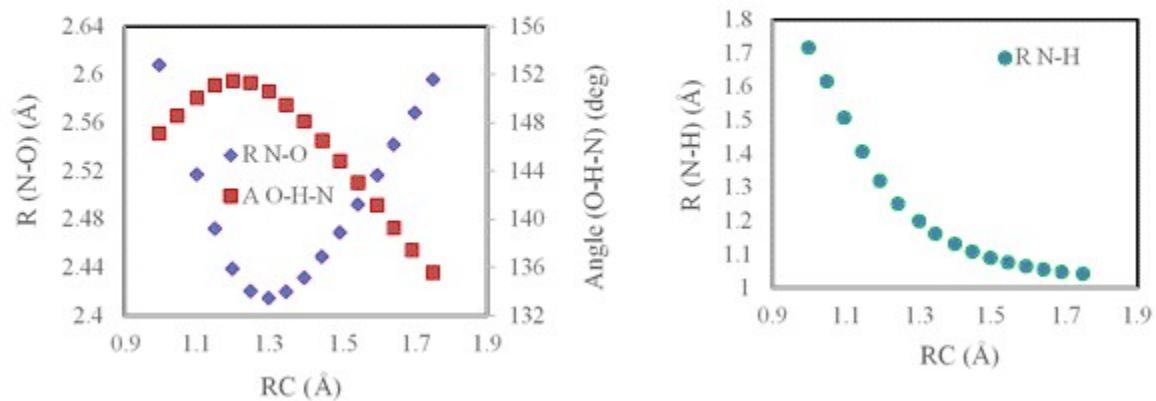

**L5**

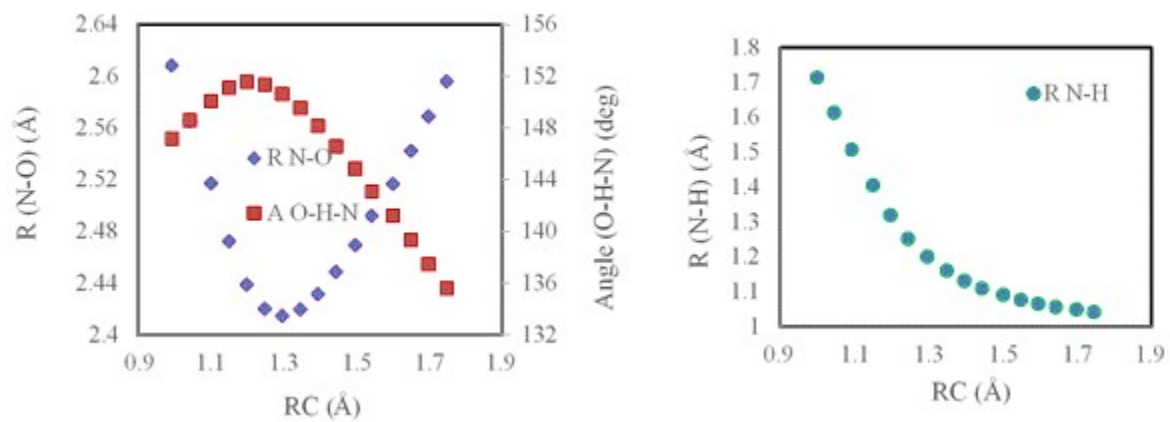

**Fig. S1.** Variations of (N-H and O-N) bond lengths and (O-H-N) bond angle in terms of RC ( $d_{OH}$ ) along the proton transfer for **L1**, **L2**, **L3**, **L4** and **L5** in the  $S_0$  state at PBE0/6-31++G(d,p) level.

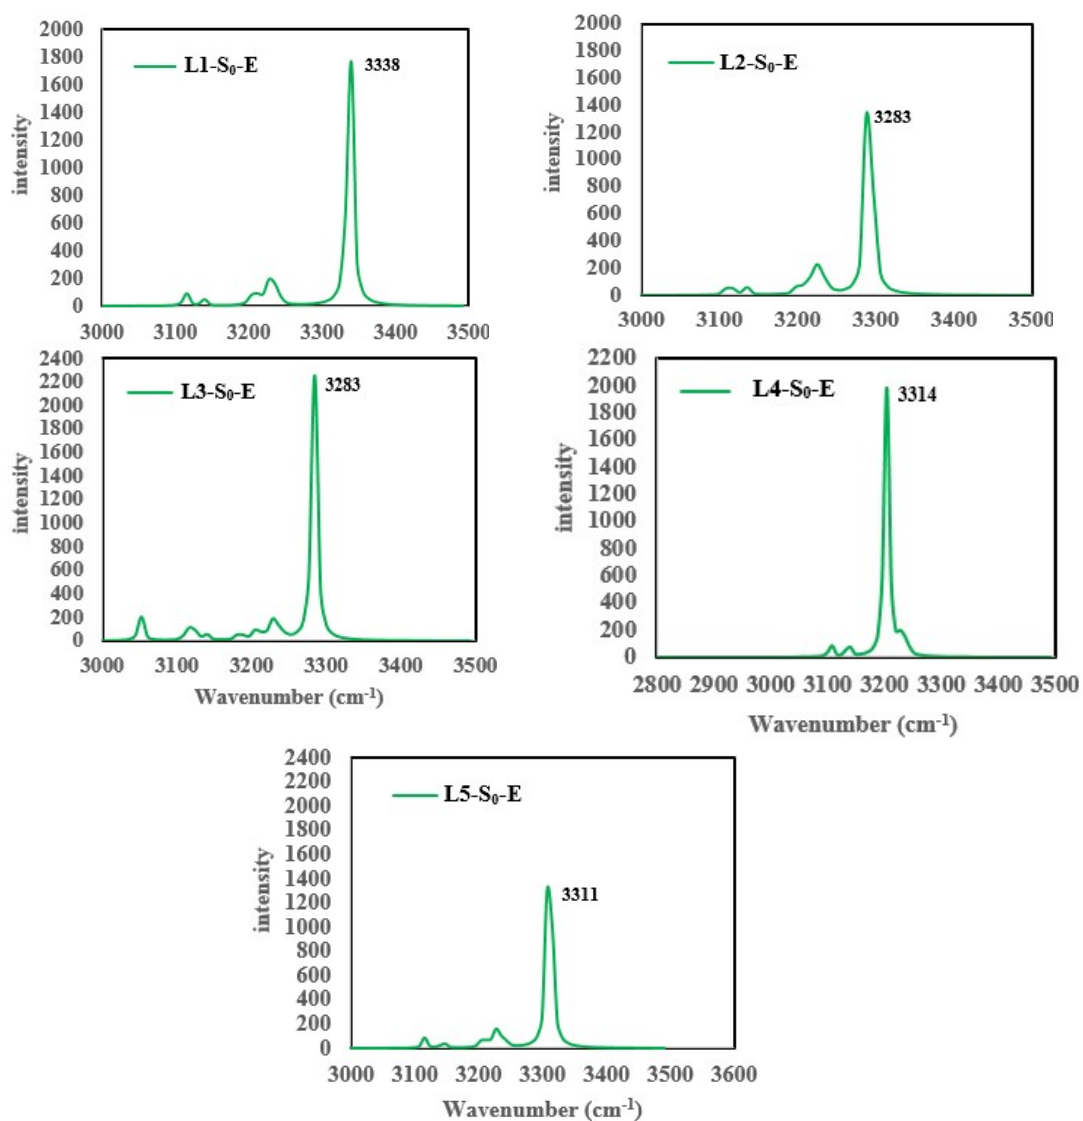

**Fig. S2.** Calculated vibrational spectra of O-H bond at the S<sub>0</sub>-E state of azine derivatives **L1-L5** (R1-5= -H, -NH<sub>2</sub>, -OCH<sub>3</sub>, -CF<sub>3</sub>, and -CN) at CAM-B3LYP/6-31++G(d,p) level.

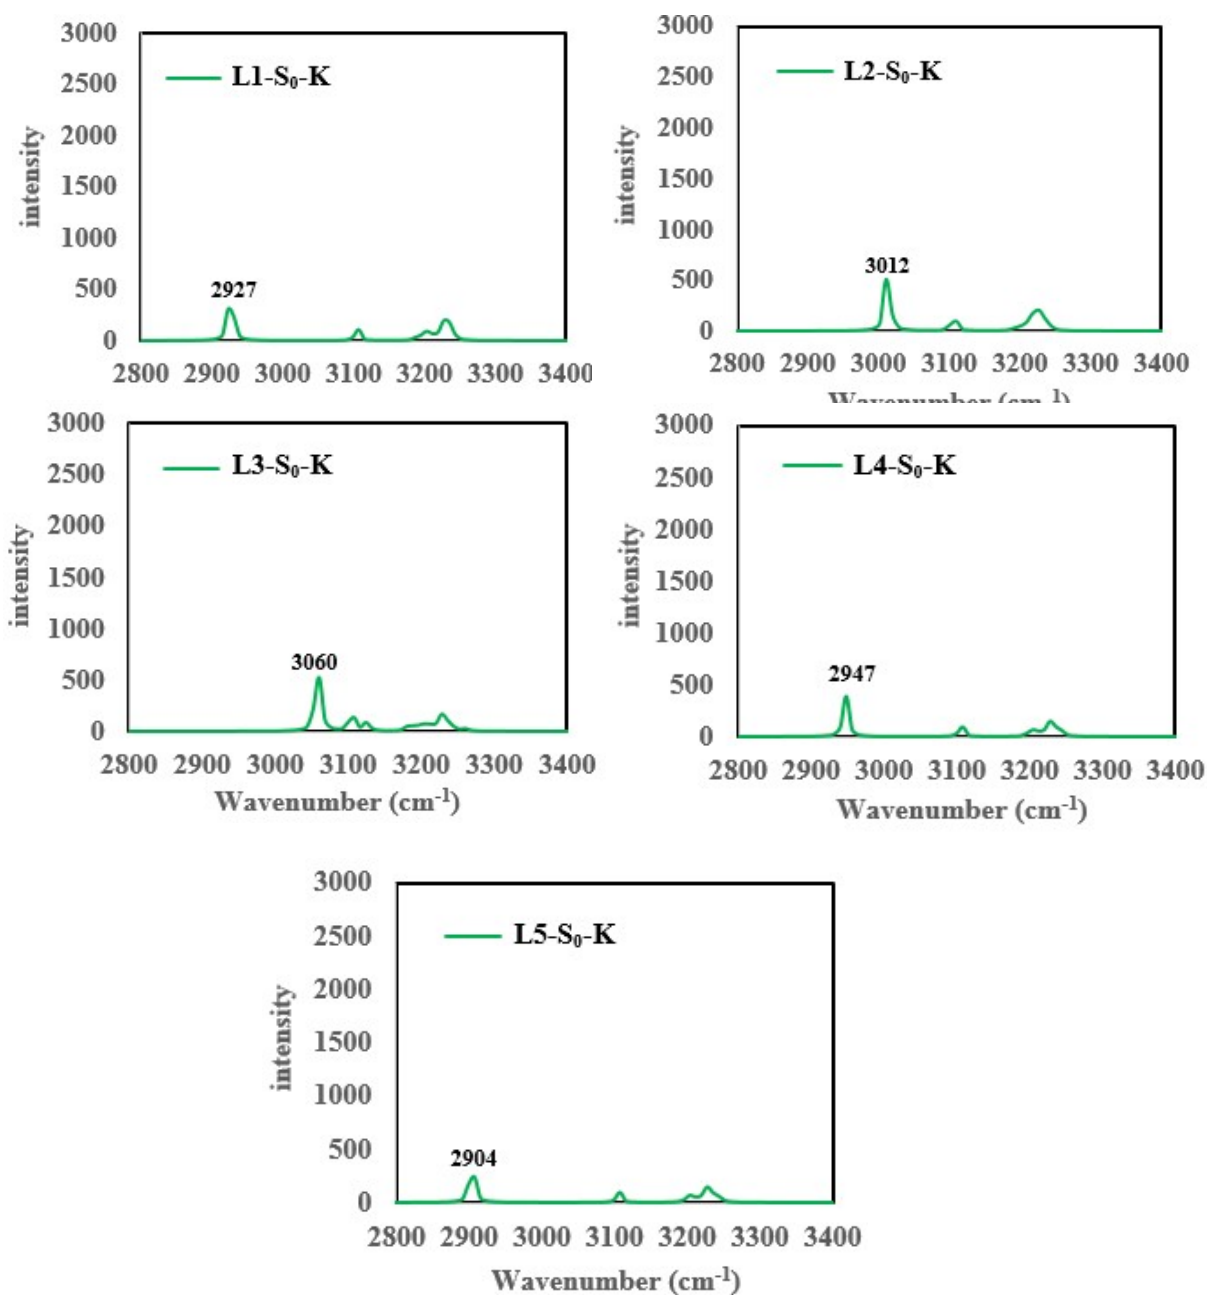

**Fig. S3.** Calculated vibrational spectra of N-H bond at the S<sub>0</sub>-K state of azine derivatives **L1-L5** (R1-5= -H, -NH<sub>2</sub>, -OCH<sub>3</sub>, -CF<sub>3</sub>, and -CN) at CAM-B3LYP/6-31++G(d,p) level.

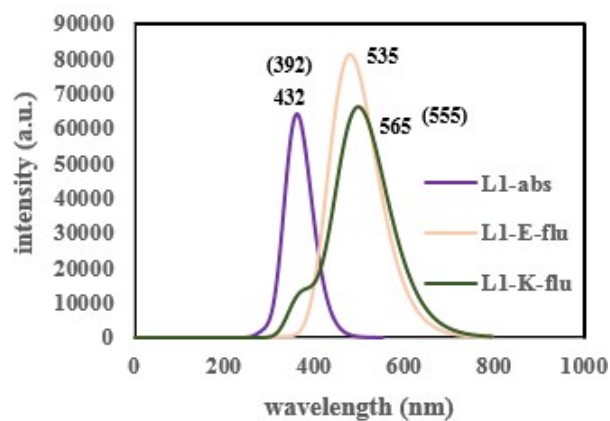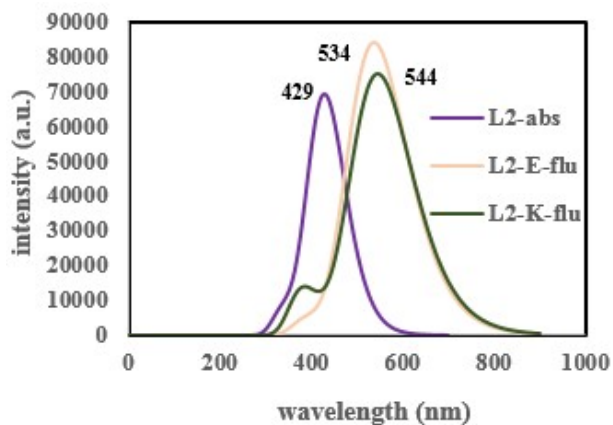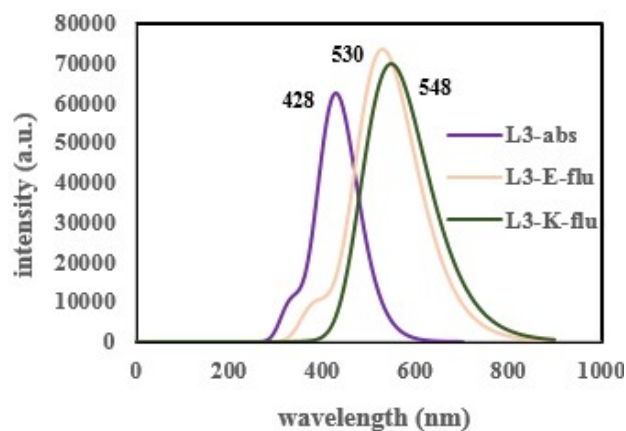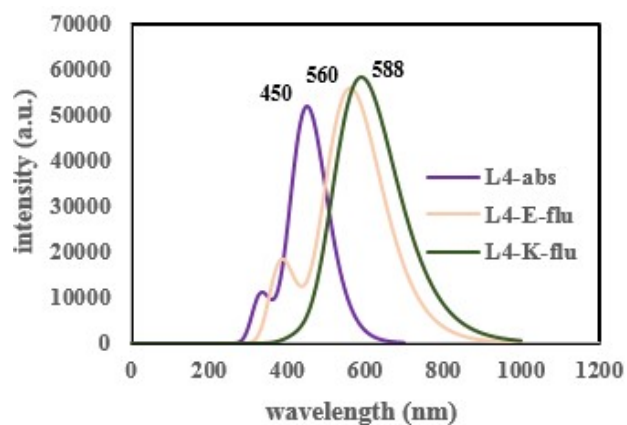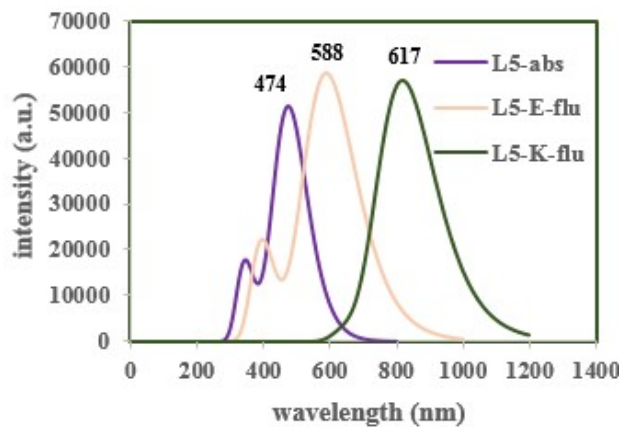



**Fig. S4.** The absorption and emission spectra of L1-L5 in MeOH solvent at PBE0/6-31++G(d,p) level. The values in parentheses are experimental data (abs: absorption spectrum; and flu: fluorescence spectrum).

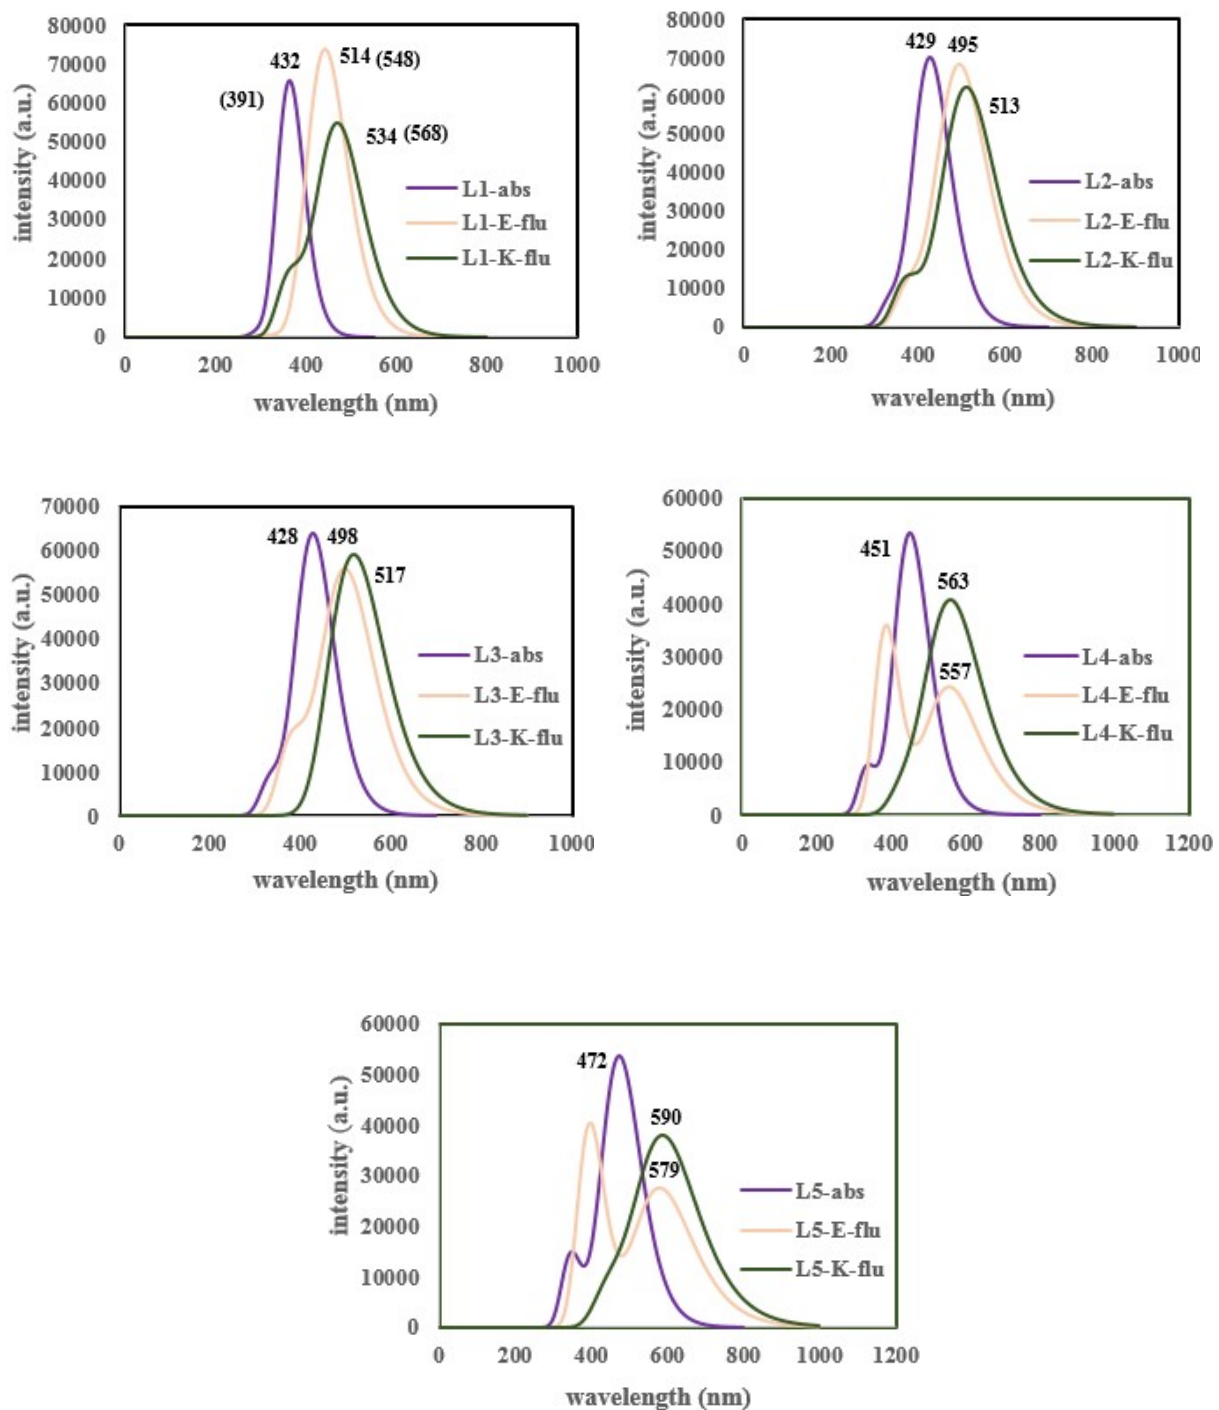

**Fig. S5.** The absorption and emission spectra of **L1-L5** in toluene solvent at PBE0/6-31++G(d,p) level. The values in parentheses are experimental data (abs: absorption spectrum; and flu: fluorescence spectrum).

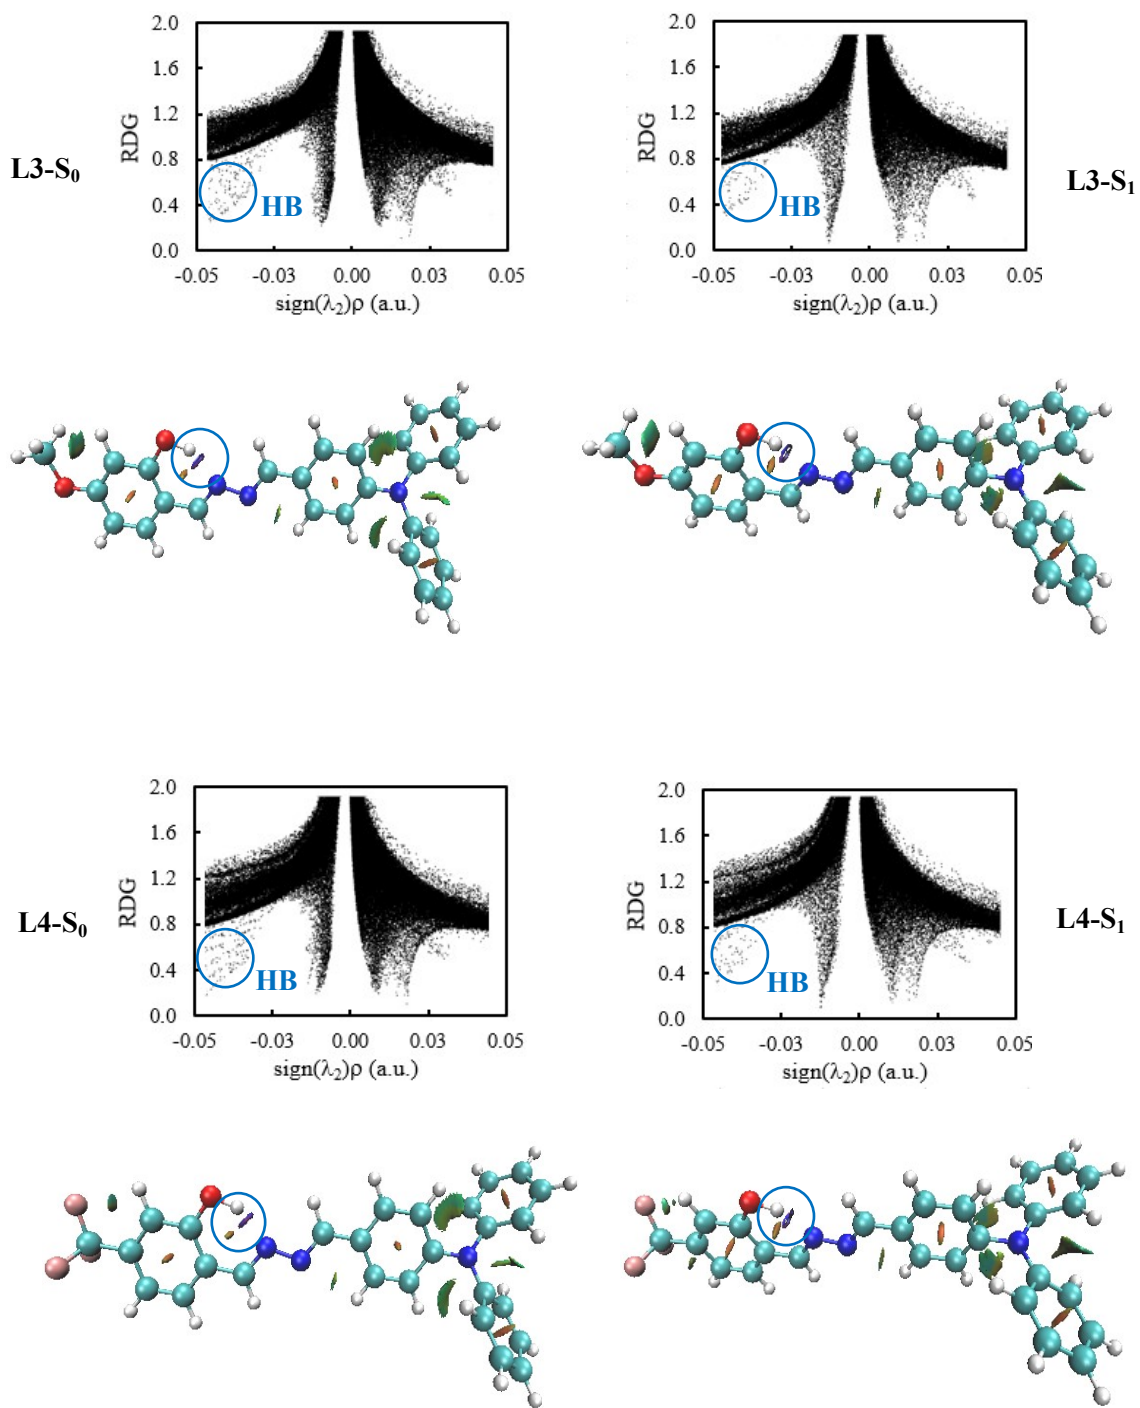

**Fig. S6.** RDG scatter plots and isosurfaces of **L3** and **L4** in the  $S_0$  and  $S_1$  states.
